# Competitive Binding of Poly- and Perfluorinated Compounds to the Thyroid Hormone Transport Protein Transthyretin

Jana M. Weiss,\* Patrik L. Andersson,† Marja H. Lamoree,\* Pim E. G. Leonards,\* Stefan P. J. van Leeuwen,\* and Timo Hamers\*<sup>1</sup>

\*Institute for Environmental Studies, Department of Chemistry and Biology, VU University, 1081 HV Amsterdam, The Netherlands; and †Department of Chemistry, Umeå University, 90187 Umeå, Sweden

Received December 10, 2008; accepted March 10, 2009

Due to their unique surfactant properties, poly- and perfluorinated compounds (PFCs) have been extensively used and can be found all over the environment. Concern about their environmental fate and toxicological properties has initiated several research projects. In the present study, we investigated if PFCs can compete with thyroxine ( $T_4$ , i.e., the transport form of thyroid hormone) for binding to the human thyroid hormone transport protein transthyretin (TTR). Such competitive capacity may lead to decreased thyroid hormone levels as previously reported for animals exposed to PFCs. Twenty-four PFCs, together with 6 structurally similar natural fatty acids, were tested for binding capacity in a radioligand-binding assay. The binding potency decreased in the order: perfluorohexane sulfonate > perfluorooctane sulfonate/perfluorooctanoic acid > perfluoroheptanoic acid > sodium perfluoro-1-octanesulfinate > perfluorononanoic acid, with TTR binding potencies 12.5–50 times lower than the natural ligand  $T_4$ . Some lower molecular weight compounds with structural similarity to these PFCs were > 100 times less potent than  $T_4$ . Simple descriptors based on the two-dimensional molecular structures of the compounds were used to visualize the chemical variation and to model the structure-activity relationship for the competitive potencies of the TTR-binding compounds. The models indicated the dependence on molecular size and functional groups but demanded a more detailed description of the chemical properties and data for validation and further quantitative structure-activity relationship (QSAR) development. Competitive binding of PFCs to TTR, as observed for human TTR in the present study, may explain altered thyroid hormone levels described for PFC-exposed rats and monkeys. Median human blood levels of the most potent TTR-binding PFCs are one to two orders of magnitude lower than concentration at 50% inhibition ( $IC_{50}$ ) values determined in the present study. In addition, this study contributes to the understanding of the bioaccumulation of PFCs in man and possibly in other wildlife species.

**Key Words:** perfluorinated compounds; thyroid hormone; thyroxine; transthyretin binding; perfluorooctane sulfonate; endocrine disruption.

Poly- and perfluorinated organic compounds (PFCs) are a class of substances characterized by a partially or fully fluorinated alkyl chain and a terminal functional group. The C–F bonds result in great stability under extreme heat and chemical stress and give the compound an oleophobic (oil repelling) property, whereas the polar head contributes to the excellent surfactant property of many PFC (e.g., perfluorinated sulfonates and carboxylates). These unique properties contribute to the widespread use of PFCs in a variety of commercial products, such as household surface finishes, food packaging, water- and stain-resistant materials, fire-fighting foams, etc. (Kissa, 2001).

Environmental research initially focused on the compounds perfluorooctane sulfonate (PFOS) and perfluorooctanoic acid (PFOA), the perfluorinated contaminants predominantly analyzed and also found in the environment. However, a variety of other PFCs are now being found worldwide in the environment, animals, and humans from urban to remote areas in all trophic levels (Houde *et al.*, 2006; Kallenborn *et al.*, 2004; Kannan *et al.*, 2004; Lau *et al.*, 2007; van Leeuwen *et al.*, 2006).

The structure of many PFCs and their behavior within the body of organisms are comparable to free fatty acids (FAs), and as such they bind to liver FA-binding protein, and the protein albumin, which is mainly present in blood, liver, and eggs (Jones *et al.*, 2003; Luebker *et al.*, 2002; Martin *et al.*, 2003). It is suggested that the polar hydrophobic nature of fluorine-containing compounds can lead to increased affinity for proteins, despite the relatively weak dipolar interactions that characterize the hard C–F dipole. The polar hydrophobic concept can explain some of the protein-binding data characteristics of fluorinated compounds (Biffinger *et al.*, 2004). Highest levels of PFCs in rodents, humans, and marine animals are accordingly found in the protein-rich blood and

<sup>1</sup>To whom correspondence should be addressed at Institute for Environmental Studies, Department of Chemistry and Biology, VU University, De Boelelaan 1085, 1081 HV Amsterdam, The Netherlands. Fax: +31 (0)20-5989553. E-mail: timo.hamers@ivm.vu.nl.

liver (Kannan *et al.*, 2004; Kudo and Kawashima, 2003; Lau *et al.*, 2003; Luebker *et al.*, 2002; Martin *et al.*, 2003; Thibodeaux *et al.*, 2003; Van den Heuvel *et al.*, 1992).

The toxicology of PFCs has recently been extensively reviewed (Kudo and Kawashima, 2003; Lau *et al.*, 2007, 2008). Among other observations, decreased thyroid hormone levels after PFC exposure have been found in monkeys and rodents (Lau *et al.*, 2003; Luebker *et al.*, 2002; Seacat *et al.*, 2002, 2003; Thibodeaux *et al.*, 2003). It has recently been shown that PFOS does not affect the regulatory functions of the thyroid hormone system itself, but it is the competitive binding to transport proteins that alters the free thyroxine ( $T_4$ ) levels in blood (Chang *et al.*, 2008; Lau *et al.*, 2007). By altering thyroid hormone levels, PFCs may affect fetal and neonatal development, especially since PFOS can cross the placental barrier in both humans (Inoue *et al.*, 2004) and rodents (Lau *et al.*, 2003; Thibodeaux *et al.*, 2003). Whether this is caused by diffusion over the membrane or mediated by transport proteins is not yet known. Thyroid hormones are associated (not covalently bound) to transport proteins such as transthyretin (TTR). This complex functions as a circulating reservoir to buffer changes in thyroid hormone levels. TTR is not only a highly conservative plasma protein and the main  $T_4$  carrier in cerebrospinal fluid (CSF) but also important in serum of most mammalian species and birds. TTR is composed of four identical 127 amino acid  $\beta$  sheet-rich subunits. X-ray studies of TTR show two funnel-shaped binding sites for  $T_4$  (Blake *et al.*, 1978), each with an inner and an outer binding site. The hydroxyl group as well as the two adjacent iodine molecules on the outer ring of the  $T_4$  structure are binding to the inner binding site of TTR, whereas the iodine atoms on the inner tyrosine ring of  $T_4$  are binding to the outer binding site of TTR (Gosh *et al.*, 2000). TTR constitutes ~25% of total CSF proteins (Aldred *et al.*, 1995), and the importance of TTR in central nervous system development is evidenced by the fact that it is present in very high concentrations during prenatal and early postnatal life (Larsen and Delallo, 1989).

The aim of this study was to screen the binding capacity of poly- and perfluorinated compounds (PFCs) and structurally similar natural FAs to the thyroid hormone transport protein TTR. Studies on TTR binding of PFCs have not been performed before and may contribute to the understanding of the behavior and toxic mode of action of PFCs, which are used in several applications and are found in many environmental matrices.

The set of PFCs and related compounds selected for testing was based on environmental relevance and on a broad variation in chemical functionalities, i.e., carbon chain length (from 4 to 18 carbons), fluorination degree (from fully to nonfluorinated chains), and different functional groups at the heads of the molecules (carboxylates, sulfonates, sulfonamides, alcohols, etc.). All 30 compound structures are represented in Table 1. In addition, 56 chemical descriptors were calculated to study the structural variation of the PFCs and to evaluate the structure-activity relationship (SAR) of the binding potency to TTR of the PFCs.

TABLE 1  
The General Structure of the Compounds Tested in this Study

|                                                                |  |
|----------------------------------------------------------------|--|
| Natural FA ( $n = 4-18$ )                                      |  |
| Perfluorinated alkyl acid ( $n = 3-13$ )                       |  |
| 7H-Perfluoroheptanoic acid ( $n = 5$ )                         |  |
| 2H-Perfluoro-2-octenoic acid (6:2) ( $n = 5$ )                 |  |
| Perfluorinated alkyl sulfonate ( $n = 4-10$ )                  |  |
| Perfluorinated octane sulfinate ( $n = 8$ )                    |  |
| Perfluorinated telomer alcohol ( $n = 6-8$ )                   |  |
| 2-(N-Methylperfluoro-1-octane sulfonamido) ethanol ( $n = 8$ ) |  |
| 2-(N-Ethylperfluoro-1-octane sulfonamido) ethanol ( $n = 8$ )  |  |
| Perfluorooctane sulfonamide ( $n = 8$ )                        |  |
| N,N-Dimethyl perfluorooctane sulfonamide ( $n = 8$ )           |  |
| N,N-methyl perfluorooctane sulfonamide ( $n = 8$ )             |  |
| N-Ethyl perfluorooctane sulfonamide ( $n = 8$ )                |  |

## MATERIALS AND METHODS

**Study compounds.** All studied compounds are described in Table 1. For all compounds, 10mM stock solutions were prepared in dimethyl sulfoxide (Acros Organics, Geel, Belgium; 99.9%), except for perfluoroundecanoic acid, perfluorododecanoic acid (PFDoA), and perfluorotetradecanoic acid (PFTdA), where 5mM stock solutions were prepared due to limited solubility at higher concentrations.

**TTR-binding assay.** The TTR-binding assay has been described in detail earlier (Hamers *et al.*, 2006; Lans *et al.*, 1993) and is modified from a method first described by Somack *et al.* (1982). Before use, the radiolabeled  $^{125}\text{I}$ -labeled  $T_4$  ( $T_4^*$ , L-3'-5'- $^{125}\text{I}$ -Thyroxine,  $\geq 95\%$ ; PerkinElmer Life and

Analytical Sciences, Waltham, MA; 4400 Ci/mmol; ~100,000 cpm, ~30pM) was cleaned up to minimize the level of free  $^{125}\text{I}$  in the solution due to degradation of  $\text{T}_4^*$ . The presence of free  $^{125}\text{I}$  in the test system leads to an overestimation of free  $\text{T}_4^*$  levels. Free  $^{125}\text{I}$  and  $\text{T}_4^*$  were separated on a Pasteur pipette column packed with a LH-20 Sephadex (Pharmacia LKB, Woerden, The Netherlands; 0.2 g in 2 ml  $\text{H}_2\text{O}$ , acidified with  $3 \times 1$  ml 0.1M HCl). The  $^{125}\text{I}$  activity of each of the following steps can be observed in Supplementary Figure 1. The  $\text{T}_4^*$  solution was acidified with 1M HCl (1:1, vol/vol), and 0.1M HCl was added to an end volume of 1 ml.  $\text{T}_4^*$  was added to the column, the tube was rinsed with 1 ml HCl (0.1M), and free iodine was eluted with  $3 \times 1$  ml HCl (0.1M),  $3 \times 1$  ml  $\text{H}_2\text{O}$ , and 0.5 ml ammonia dissolved in ethanol (1:99, vol/vol). To collect the purified  $\text{T}_4^*$ , ~1 ml ammonia ethanol (1:99, vol/vol) was added, and during constant monitoring of radioactivity, the majority of the  $\text{T}_4^*$  was eluted from the column in a minimal volume. TTR-binding experiments were performed within 3 weeks of  $^{125}\text{I}$ - $\text{T}_4$  cleanup.

The incubation mixture, consisting of human TTR (Sigma-Aldrich, St Louis, MO; 30nM), Tris-HCl buffer (pH 8.0; 0.1M NaCl, 0.1mM EDTA) with a 55nM mixture of  $\text{T}_4^*$  and unlabeled  $\text{T}_4$  (Sigma-Aldrich), and competitor (10–10,000nM), was incubated overnight at  $4^\circ\text{C}$  in a final volume of 200  $\mu\text{l}$ . The  $\text{T}_4$  levels in the bioassay resemble physiologically relevant  $\text{T}_4$  levels close to the lower range of total  $\text{T}_4$  in human blood of healthy adults (Hamers *et al.*, 2008). Unlabeled  $\text{T}_4$  (4–1024nM) was used as a reference compound. After incubation, TTR-bound and free  $\text{T}_4^*$  were separated on 1-g Biogel P-6PG (Bio-Rad Laboratories, Hercules, CA) columns and spin forced with additional 200  $\mu\text{l}$  Tris-HCl buffer (1 min, 1000 rpm). The TTR-bound  $\text{T}_4^*$ -containing eluate was counted for radioactivity on a gamma counter (LKB Wallack; 1282 Compu-gamma CS, Turku, Finland) and corrected for the initial amount of  $\text{T}_4^*$  counted in the incubation mixture before incubation.

Relative  $\text{T}_4^*/\text{T}_4$ -protein binding was plotted against added log competitor concentration, and competition binding curves were least square fitted to the data with nonlinear regression curve (Graphpad Prism, version 5.01). Binding characteristics of the test compounds are calculated as relative potency compared to  $\text{T}_4$  ( $\text{T}_4$ -REP), i.e., the ratio concentration at 50% inhibition ( $\text{IC}_{50}$ )  $\text{T}_4$ : $\text{IC}_{50}$  test compound. For compounds yielding responses less than 50%, model fits were performed assuming an inhibition slope of  $-1.38$  (mean of high response slopes) and a maximum TTR-binding capacity of 100%.

To exclude that the acidic nature of the PFCs and the FAs affected the pH in the assay, the pH in the incubations was checked with universal indicator paper (Merck, Darmstadt, Germany; resolution 1 pH unit) to monitor any large variations. The pH was shown to be stable at pH 8.

To exclude that a decreased  $\text{T}_4^*$ -TTR binding was caused by the surfactant character of PFCs, which may change the structure of TTR or decrease the availability of TTR or  $\text{T}_4$  in the incubation mixture, additional binding experiments were performed with  $\text{T}_4$  (control curve) or a mixture of six PFCs in combination with either 30 or 60nM TTR. The mixture consisted of perfluorobutyric acid (PFBA), perfluorodecanoic acid (PFDCa), PFDoA, PFTdA, 7H-perfluoroheptanoic acid (7H-PFHpA), and PFOS in a molar ratio of 2.7:1.1:1.1:1.1:1.0, respectively. The rationale of this experiment was that increasing the TTR concentration leads to an increase in the absolute  $\text{T}_4^*$ -TTR binding in case of pure competition between  $\text{T}_4^*$  and PFCs. If PFCs change the structure of TTR or decrease the availability of TTR or  $\text{T}_4$  in the incubation mixture, an increase in TTR cannot lead to an increase in TTR-bound  $\text{T}_4^*$ , given the excess of PFC (maximum 10000nM) in the incubation mixture compared to  $\text{T}_4^*$  (maximum 1024nM) and to TTR (maximum 60nM).

**High Performance Liquid Chromatography (HPLC)-Electron Spray Ionisation (ESI)-tandem Mass Spectrometry (MS/MS).** In parallel, retention times were determined for all compounds as a chemical descriptor for SAR evaluation by HPLC-ESI-MS/MS as described by van Leeuwen *et al.* (unpublished data).

**Chemical descriptors.** Based on two-dimensional molecular structures, chemical descriptors were derived in Molecular Operating Environment (Chemical Computing Group). In total, 56 descriptors were used comprising, e.g., molecular volume, surface area, weight, diameter, radius, number of

hydrogen bond donors and acceptors, topological indices such as Zagreb, Balaban, Kier, and Hall chi indices, and partial charges. The partial charge descriptors include 16 parameters reflecting total and fractional positive and negative partial charges and partial charges related to total surface area and hydrophobic and polar surface area. HPLC retention times as described above were also included in the set of chemical descriptors.

**SAR analysis.** In order to study the chemical diversity of the PFCs, as described by the 56 calculated molecular descriptors (Supplementary Table 1), principal component analysis (PCA) was applied (Jackson, 1991).

A relation between the chemical characteristics of the PFCs and the TTR binding potency was searched using partial least squares regression (PLS). In brief, the systematic variation is searched in an X-matrix, here including the calculated chemical descriptors, and correlated with the systematic variation in the Y-matrix (here  $\text{IC}_{50}$  values) including the observed response. Latent variables are formed of the matrices and their relationship is maximized through a weight vector. To give each parameter equal chance to influence the model, the data were preprocessed by auto-scaling and mean centering. The dimensionality of the PCA and PLS models was statistically checked by cross-validation (Wold, 1978). For statistical evaluation of the calculated models,  $R^2X$ ,  $R^2Y$ , and  $Q^2$  are given, i.e., the explained variance in the X- and Y-matrix and the cross-validated explained variance, respectively. The predictability of the model can be validated through the  $Q^2$  value or through the value root mean squared error of prediction (RMSEP). RMSEP is calculated using an external validation set, i.e., compounds that were not part of the establishment of the model. RMSEP is calculated as  $(\text{PRESS}/N)^{1/2}$ , where PRESS is the prediction error sum of squares and  $N$  equals the number of compounds in the validation set. In order to discuss outlying properties of the compounds' TTR binding potency, DModY was used. DModY is the distance of an observation to the model in the Y space (Eriksson *et al.*, 1999). The PCA and PLS calculations were performed on a PC using SIMCA-P version 11.0 software 2005 (Umetrics AB, Umeå, Sweden).

## RESULTS

For perfluorinated alkyl acids (PFAA), TTR binding potency varied with carbon chain length (Fig. 1A), with a maximum potency at a chain length of eight carbons (PFOA). The binding potency is clearly associated with the degree of fluorination of the alkyl chain (Fig. 1B). FAs with no fluorine atoms show no binding to TTR (octanoic acid), whereas the fully fluorinated PFOA has a high potency. The 6:2-2H-perfluoro-2-octenoic acid and the 7H-PFHpA with the same number of fluorine atoms ( $n = 12$ ) but different chain lengths (seven and eight, respectively) have similar TTR binding potency. Perfluorohexane sulfonate (PFHxS) has the highest potency (not statistically significant) of the perfluorinated alkyl sulfonates (PFAS), closely followed by PFOS (Fig. 1C). For PFCs with a carbon chain length of four to eight, TTR binding potencies were significantly higher for compounds containing a sulfonate functional group than for those containing a carboxylic acid functional group (paired *t*-test of mean  $\text{IC}_{50}$  value in each functional group category,  $p = 0.01$ ). PFAA with a carbon chain length longer than eight have low TTR binding potencies (Fig. 1A), whereas the equivalent PFAS (perfluorodecane sulfonate) exhibits no binding to TTR at all (Fig. 1C). Actually, L-PFDS seemed to increase the %  $\text{T}_4$  bound to TTR (Fig. 1C). Similarly, nonfluorinated FAs also exhibit no TTR binding potency at all (Fig. 1D), whereas an increase in  $\text{T}_4$ -TTR

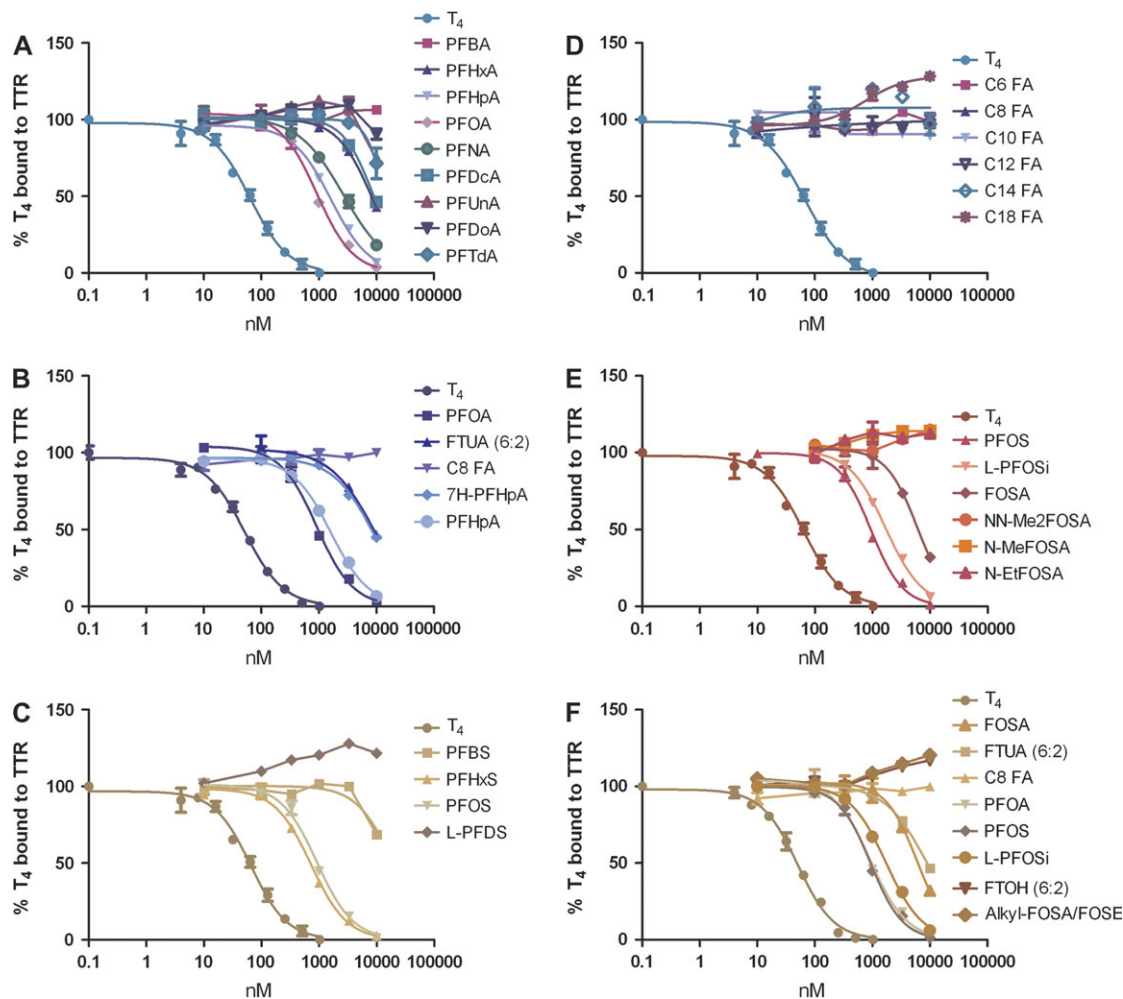

**FIG. 1.** (A–E) Dose-response curves (%  $T_4$  bound to TTR) for  $T_4$  calibration curves and different concentrations of competitors (nM), i.e., (A) PFAA with different carbon chain length (C4–C14), (B) PFAA with the same carbon chain length ( $2 \times C7$  and  $3 \times C8$ ) and different fluorination grade, (C) PFAS with different carbon chain length (C4–C10), (D) nonfluorinated free FAs with different carbon chain length (C6–C18), (E) PFOS and sulfinate (perfluorinated octane sulfinate) and (N-substituted) perfluorooctane sulfonamides, and (F) PFCs with carbon chain length of eight and different functional groups. Alkyl-FOSA/FOSE represents the curve of N-MeFOSE, N-EtFOSE, N,N-Me2FOSA, N-MeFOSA and N-EtFOSA.

binding was observed at high concentrations of FAs. This phenomenon has earlier been described when Biogel columns were loaded with partially cleaned up environmental samples (Hamers *et al.*, 2008). It is believed that this is not a true increase in TTR binding but rather a methodological artifact by which lipophilic compounds in the sample facilitate the elution of free  $T_4$  through the column.

Of the six PFCs with the same fluorinated carbon chain length (C8) but with different sulfate-based functional groups, highest binding potency was observed for the sulfonate (PFOS), followed by the sulfinate (perfluorinated octane sulfinate) and the sulfonamide (perfluoro-1-octane sulfonamide) (Fig. 1E). Test compounds with the sulfonamide functional group protected by an alkyl group had no TTR binding potency themselves but seemed to cause a slight increase in  $T_4$ -TTR binding at high test concentrations (Fig. 1E).

In total, 12 compounds were tested with the same carbon chain length ( $n = 8$ ) but with different number of fluorine on the carbon chain and functional end groups with or without substitutions (Fig. 1F). The binding potency depended on the functional group and the number of fluorine (mentioned in brackets) in the order of  $SO_3(17) \approx COOH(17) > SO_2(17) > SO_2NH_2(17) > COOH(15) > COOH(0) \approx telomer-OH(13) \approx N\text{-alkyl-SO}_2(17) \approx N\text{-alkyl-SO}_2NH_2(17)$ .

A summary of all the data derived from the full dose-response curves, i.e., % TTR binding at maximum test concentration,  $IC_{50}$ , slope of the curve,  $T_4$ -REP, HPLC retention times, as well as the origin and purity of the compounds are given in Table 2.  $T_4$ -REP factors ranged from not detected (n.d.,  $n = 15$ ) to 0.085 (Fig. 2). The average  $IC_{50} \pm SD$  of the  $T_4$  calibration curve was  $61 \pm 5$  nM ( $n = 9$ ).

This study covers testing of 24 PFCs with a large chemical variation (here reflected by, e.g., molecular volume and area,

TABLE 2

Information about the Analyzed Compounds (Abbreviation, End Functional Group, Full Name, CAS Number, Molecular Weight, Origin of Purchase, and Purity) and A Summary of All the Data Derived from the Full Dose-Response Curves for All Compounds Tested (% Inhibition of T<sub>4</sub>-TTR Binding at Maximum Concentration, Concentration at 50% Inhibition (IC<sub>50</sub>), Slope of Dose-Response Curve, T<sub>4</sub>-REP Factor and High Performance liquid Chromatography Retention Time [RT])

| Abbreviation   | End group                 | Full name                                          | CAS number | Molecular weight (g/mol) | T <sub>4</sub> -TTR binding (%) <sup>a</sup> | IC <sub>50</sub> (nM) | Slope <sup>b</sup> | T <sub>4</sub> -REP factor | RT (min) | Purity (%)          |
|----------------|---------------------------|----------------------------------------------------|------------|--------------------------|----------------------------------------------|-----------------------|--------------------|----------------------------|----------|---------------------|
| T <sub>4</sub> | OH                        | Thyroxine                                          | 7488-70-2  | 776.9                    |                                              | 61                    | -1.17              | 1                          |          |                     |
| C6 FA          | COOH                      | Hexanoic acid                                      | 142-62-1   | 116.2                    | 99                                           | n.d.                  | —                  | n.d.                       | n.a.     | ≥ 99.5 <sup>c</sup> |
| C8 FA          | COOH                      | Octanoic acid (Caprylic acid)                      | 124-07-2   | 144.2                    | 100                                          | n.d.                  | —                  | n.d.                       | 24.0     | ≥ 99.5 <sup>d</sup> |
| C10 FA         | COOH                      | Decanoic acid (Capric acid)                        | 334-48-5   | 172.3                    | 89                                           | n.d.                  | —                  | n.d.                       | 34.0     | ≥ 99.5 <sup>d</sup> |
| C12 FA         | COOH                      | Lauric acid                                        | 143-07-7   | 200.3                    | 97                                           | n.d.                  | —                  | n.d.                       | 40.5     | ≥ 99.5 <sup>d</sup> |
| C14 FA         | COOH                      | Myristic acid                                      | 544-63-8   | 228.4                    | 97                                           | n.d.                  | —                  | n.d.                       | 45.3     | ≥ 99.5 <sup>d</sup> |
| C18 FA         | COOH                      | Stearic acid                                       | 57-11-4    | 284.5                    | 128                                          | n.d.                  | —                  | n.d.                       | 51.3     | ≥ 99.5 <sup>d</sup> |
| PFBA           | COOH                      | Perfluorobutyric acid                              | 375-22-4   | 214.0                    | 106                                          | n.d.                  | —                  | n.d.                       | 11.7     | 99 <sup>e</sup>     |
| PFHxA          | COOH                      | Perfluorohexanoic acid                             | 307-24-4   | 314.0                    | 43                                           | 8220                  | -1.45              | 0.007                      | 28.1     | ≥ 98 <sup>e</sup>   |
| PFHpA          | COOH                      | Perfluoroheptanoic acid                            | 375-85-9   | 364.1                    | 7                                            | 1565                  | -1.26              | 0.039                      | 31.9     | 96 <sup>f</sup>     |
| PFOA           | COOH                      | Perfluorooctanoic acid                             | 335-67-1   | 414.0                    | 4                                            | 949                   | -1.41              | 0.064                      | 34.7     | 96 <sup>f</sup>     |
| PFNA           | COOH                      | Perfluorononanoic acid                             | 375-95-1   | 464.0                    | 18                                           | 2737                  | -1.11              | 0.022                      | 37.1     | 97 <sup>c</sup>     |
| PFDCa          | COOH                      | Perfluorodecanoic acid                             | 335-76-2   | 514.0                    | 46                                           | 8954                  | -1.65              | 0.007                      | 39.1     | ≥ 98 <sup>e</sup>   |
| PFUnA          | COOH                      | Perfluoroundecanoic acid                           | 2058-94-8  | 563.9                    | 74                                           | 21,560                | (-1.38)            | 0.003                      | 40.9     | 95 <sup>c</sup>     |
| PFDa           | COOH                      | Perfluorododecanoic acid                           | 307-55-1   | 614.0                    | 91                                           | 46,894                | (-1.38)            | 0.001                      | 42.4     | 95 <sup>c</sup>     |
| PFTdA          | COOH                      | Perfluorotetradecanoic acid                        | 376-06-7   | 713.9                    | 71                                           | 28,996                | (-1.38)            | 0.002                      | 45.0     | 96 <sup>e</sup>     |
| 7H-PFHpA       | COOH                      | 7H-Perfluoroheptanoic acid                         | 1546-95-8  | 346.1                    | 45                                           | 8637                  | -1.19              | 0.007                      | n.a.     | 98 <sup>e</sup>     |
| FTUA (6:2)     | COOH                      | 2H-Perfluoro-2-octenoic acid (6:2)                 | n.a.       | 358.1                    | 47                                           | 8848                  | -1.18              | 0.007                      | 30.0     | > 99 <sup>g</sup>   |
| PFBS           | SO <sub>3</sub>           | Perfluorobutane sulfonate                          | 2795-39-3  | 300.0                    | 69                                           | 19,460                | (-1.38)            | 0.003                      | 24.2     | n.v. <sup>c</sup>   |
| PFHxS          | SO <sub>3</sub>           | Perfluorohexane sulfonate                          | 3871-99-6  | 400.0                    | 3                                            | 717                   | -1.40              | 0.085                      | 32.3     | ≥ 98 <sup>d</sup>   |
| PFOS           | SO <sub>3</sub>           | Perfluorooctane sulfonate                          | 2795-39-3  | 500.0                    | 1                                            | 940                   | -1.56              | 0.065                      | 37.2     | ≥ 98 <sup>d</sup>   |
| L-PFDS         | SO <sub>3</sub>           | Perfluorodecane sulfonate                          | n.a.       | 622.1                    | 122                                          | n.d.                  | —                  | n.d.                       | 40.0     | > 99 <sup>g</sup>   |
| L-PFOSi        | SO <sub>2</sub>           | Perfluorooctane sulfinate                          | n.a.       | 506.1                    | 6                                            | 1733                  | -1.38              | 0.035                      | 38.0     | > 99 <sup>g</sup>   |
| FTOH (6:2)     | OH                        | 2-Perfluorohexyl ethanol                           | 647-42-7   | 364.1                    | 117                                          | n.d.                  | —                  | n.d.                       | 34.4     | 98 <sup>e</sup>     |
| FTOH (8:2)     | OH                        | 2-Perfluorooctyl ethanol                           | 678-39-7   | 464.1                    | 117                                          | n.d.                  | —                  | n.d.                       | n.a.     | 98 <sup>e</sup>     |
| N-MeFOSE       | NR-(CH <sub>2</sub> ) OH  | 2-(N-methylperfluoro-1-octane sulfonamido) ethanol | 24448-09-7 | 557.2                    | 119                                          | n.d.                  | —                  | n.d.                       | 46.1     | > 99 <sup>g</sup>   |
| N-EtFOSE       | NR-(CH <sub>2</sub> ) 2OH | 2-(N-ethylperfluoro-1-octane sulfonamido) ethanol  | 1691-99-2  | 571.3                    | 122                                          | n.d.                  | —                  | n.d.                       | 47.1     | > 99 <sup>g</sup>   |
| FOSA           | NH <sub>2</sub>           | Perfluorooctane sulfonamide                        | 754-91-6   | 499.2                    | 32                                           | 6124                  | -1.63              | 0.010                      | 43.1     | > 99 <sup>g</sup>   |
| N,N-Me2FOSA    | NR <sub>2</sub>           | N,N-dimethyl perfluorooctane sulfonamide           | n.a.       | 527.2                    | 115                                          | n.d.                  | —                  | n.d.                       | n.a.     | > 99 <sup>g</sup>   |
| N-MeFOSA       | NRH                       | N-methyl perfluorooctane sulfonamide               | 31506-32-8 | 513.2                    | 114                                          | n.d.                  | —                  | n.d.                       | 46.1     | > 99 <sup>g</sup>   |
| N-EtFOSA       | NRH                       | N-ethyl perfluorooctane sulfonamide                | 4151-50-2  | 527.2                    | 112                                          | n.d.                  | —                  | n.d.                       | 47.1     | > 99 <sup>g</sup>   |

n.a., not available; n.d., not detected; n.v., not verified.

<sup>a</sup>At maximum concentration (10 μM) of competitor.

<sup>b</sup>The mean slope of the dose-response curves reaching 50% binding are given in brackets.

<sup>c</sup>Sigma-Aldrich Chemie GmbH, Buchs, Switzerland.

<sup>d</sup>Fluka, Buchs, Switzerland.

<sup>e</sup>ABCR GmbH & Co, Karlsruhe, Germany.

<sup>f</sup>Acros Organics.

<sup>g</sup>Wellington Laboratories, Guelph, Canada.

connectivity indices, retention times, etc.) as illustrated in the PCA score plot describing 83% of the chemical variation with two principal components (Fig. 3). The PCA based on 56 calculated chemical descriptors revealed clear groupings

among the compounds. The most significant chemical property that separates the chemicals in the first dimension (t1) of the PCA is the molecular size, here reflected by, e.g., molecular volume and area, connectivity indices, retention times, and

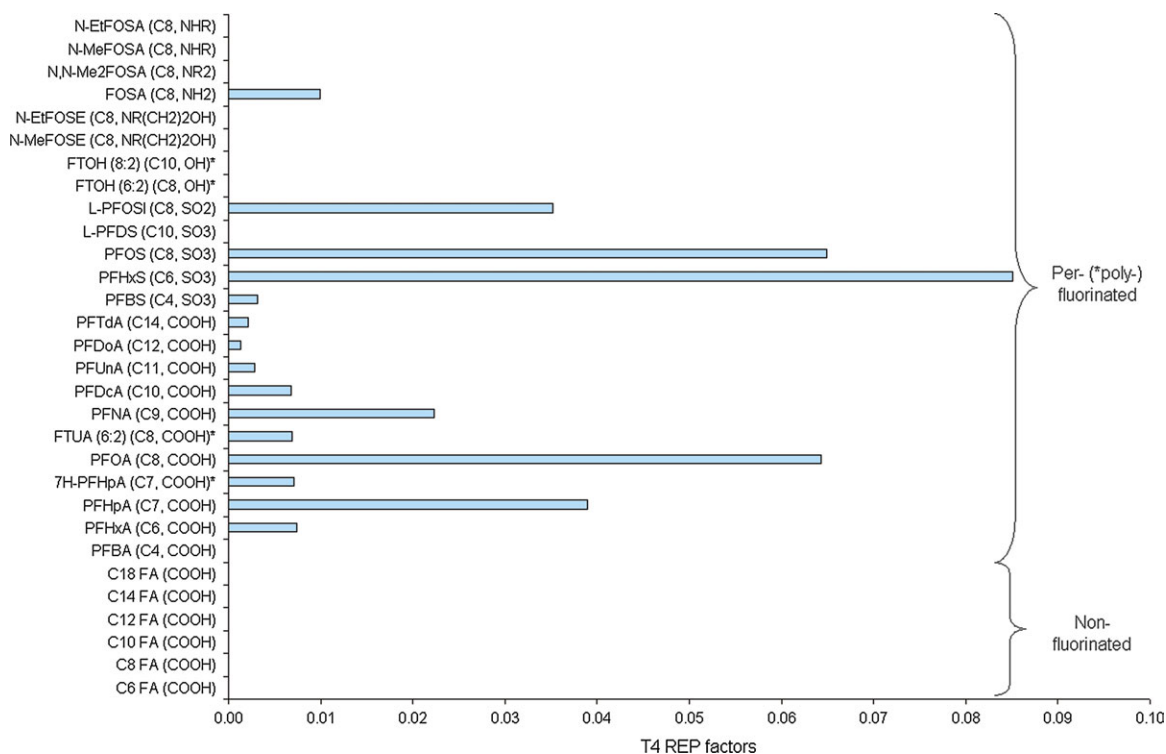

**FIG. 2.** The results of the TTR binding assay expressed as T4 equivalent factors for all tested compounds. The carbon chain length and the functional end group are given between brackets.

total positive partial charge. Large compounds (e.g., PFTdA) have high score values in the t1, and small compounds, such as PFBA and perfluorobutane sulfonate (PFBS), have low score values. PFBS and PFBA are also clearly separated from their

respective chemical class based on their short chain length. The acids and telomer alcohols are split from the sulfonamides and sulfonates based merely on their partial charge characteristics (second dimension [t2]). These compounds have lower total

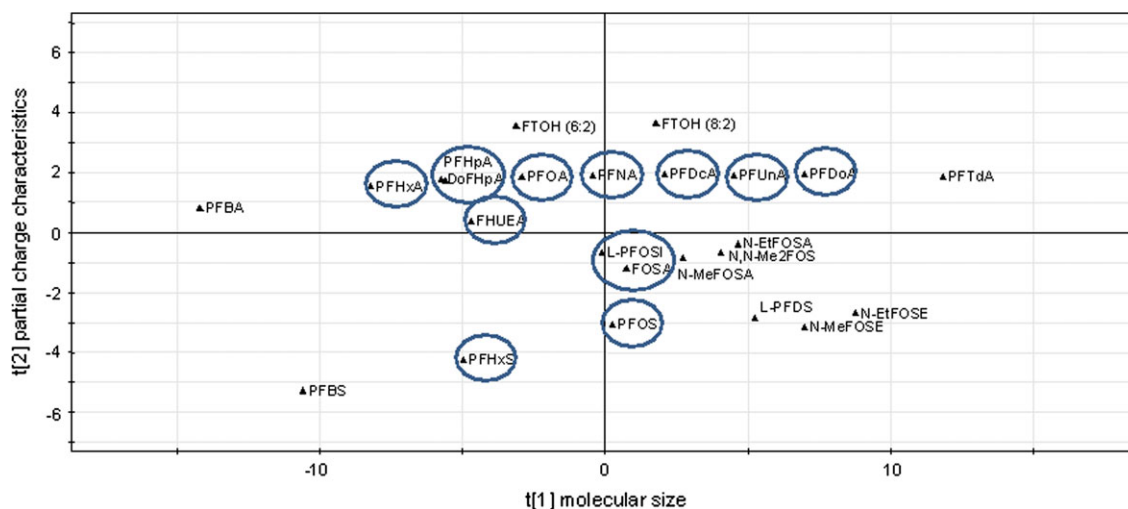

**FIG. 3.** Score plot with the first two dimensions (t1 and t2) where all tested fluorinated compounds were characterized using 56 chemical descriptors. Encircled compounds are those with relative TTR binding potencies;  $IC_{50}$  values  $< 10\mu M$ . The corresponding loading plot is given in the supplementary material. The compounds are abbreviated according to Table 2. The carbon chain length and the functional end group is given between brackets.

and relative negative polar surface area and higher relative hydrophobic surface area (Supplementary Fig. 2). The amides and sulfonates are less well separated in the  $t_2$ .

Those chemicals with  $IC_{50} < 10\mu M$  are marked in the score plot in Figure 3. Clearly, the chemical domain of the most active substances covers average size PFCs and mainly the acids. Associations were searched between chemical properties and TTR-binding potencies of the PFCs to establish a quantitative structure-activity relationship (QSAR) model and to increase our understanding of the mechanism of action involved. However, the resulting PLS model developed on the 56 chemical descriptors and the  $IC_{50}$  values for all 15 active PFCs were not significant. The PLS model diagnosed PFBS as an outlier according to its distance to the X- and the Y-block (DModX and -Y), i.e., according to its chemical properties and its TTR binding potency. In a second PLS model excluding PFBS, two significant components were found explaining 61% of the variation in the response using 88% of the chemical variation and with a cross-validated explained variance of 41%. The observed versus predicted  $IC_{50}$  values plot is shown in Figure 4. Significant chemical descriptors in this model were size-related connectivity indices and diameter and radius, and surface-describing descriptors related to total and negative polar surface area.

Under standard testing conditions, the PFC mixture consisting of PFBA, PFDcA, PFDoA, PFTdA, 7H-PFHpA, and PFOS (Fig. 5) had an  $IC_{50}$  value of 511nM (SD 11), expressed as PFOS concentration in the mixture. Doubling the TTR concentration (60nM) yielded a dose-response curve with a maximum  $T_4$ -TTR binding of 202%, while the  $IC_{50}$  of the

PFC mixture did not differ significantly (510nM, SD 25;  $F$ -test;  $p > 0.05$ ). This indicates that the decreased  $T_4$ -TTR binding in the presence of PFCs is caused by true competition between  $T_4$  and PFCs and not by changes in  $T_4$  or TTR availability due to the surfactant character of PFCs.

To evaluate whether the TTR binding potencies of PFCs are additive or not, test concentrations of the PFC mixture were expressed as  $T_4$ -equivalent ( $T_4$ -EQ) concentrations. First, the concentration of each individual PFC in the mixture was multiplied with its respective  $T_4$ -REP factor. Next, the  $T_4$ -EQ concentrations of the six individual PFCs were summed up into a single  $T_4$ -EQ value for the mixture. The measured TTR binding potency of the PFC mixture was plotted against the  $T_4$ -EQ concentration (Fig. 6) and could be compared directly to the  $T_4$  calibration curve since concentrations of  $T_4$  and PFCs have similar units (i.e., nM  $T_4$ -EQ). Compared to the  $T_4$  curve, the dose-response curve of the PFC mixture was significantly shifted to the left ( $F$ -test;  $p < 0.01$ ), yielding an  $IC_{50}$  for the PFC mixture (37nM  $T_4$ -EQ, SD 2) that was 1.6 times lower than the  $IC_{50}$  of  $T_4$  (61nM  $T_4$ -EQ, SD 5). This result indicates that less PFC is needed for a 50% inhibition of  $T_4$ -TTR binding than was to be expected based on concentration addition. It is not to be expected that the statistically significant 1.6-fold deviation from concentration addition has high biological significance. Nevertheless, the possible synergistic effect of PFCs deserves further investigation with different PFC mixtures in different biologically relevant compositions reflecting exposure profiles of vulnerable groups as children, toddlers, pregnant women, and occupationally exposed humans.

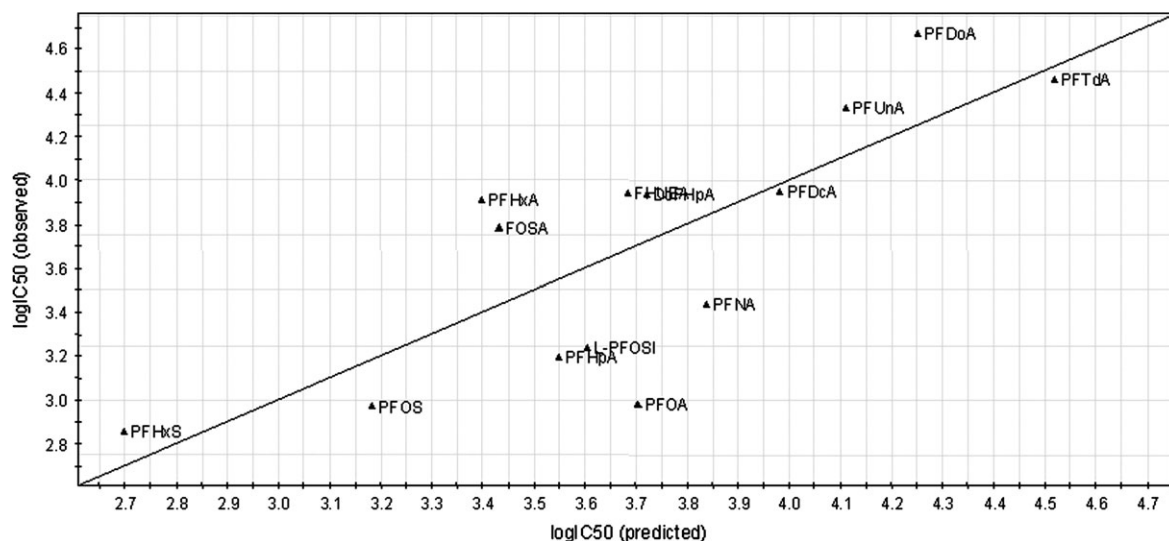

**FIG. 4.** Observed versus predicted relative TTR binding potencies ( $IC_{50}$ ) for 23 polyfluorinated compounds calculated using PLS. The responses were normalized by the logarithm prior modeling. The compounds are abbreviated according to Table 2.

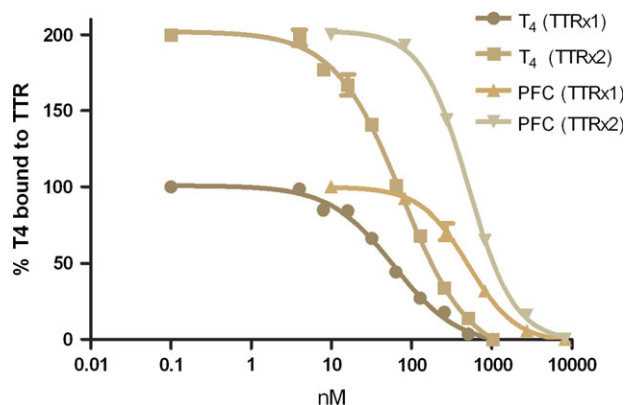

**FIG. 5.** Dose-response curves (%  $T_4$  bound to TTR) for  $T_4$  calibration curves and different concentrations of a PFC mixture (nM) with two different concentrations of TTR.

## DISCUSSION AND CONCLUSION

All three chemical functionalities that varied (i.e., degree of fluorination, carbon chain length, and functional end group) in the test set affected the TTR binding potency of PFCs. PFCs with higher fluorination degree show higher affinity for TTR compared to lower fluorinated PFCs, which is similar to earlier studies with halogenated phenols (Gosh *et al.*, 2000; Meerts *et al.*, 2000; Ucán-Marín *et al.*, 2009; van den Berg, 1990). The length of the PFC carbon chain has been reported to affect several properties, e.g., the bioaccumulation factor (BAF) and the depuration rate constant of PFAA and PFAS in rainbow trout (Martin *et al.*, 2003), and the potency of PFOS to inhibit gap junctional intercellular communication in rats and dolphins (Hu *et al.*, 2002). The two latter effects peaked around a chain length of eight carbons, whereas the BAF for PFAA increased with a chain length of more than eight carbons; PFAS and PFAA with chain lengths shorter than seven and six carbons,

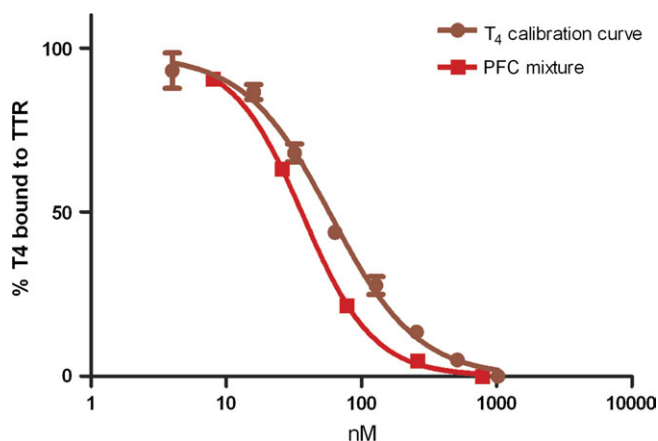

**FIG. 6.** Dose-response curves (%  $T_4$  bound to TTR) for  $T_4$  calibration curve and a theoretical curve of the PFC mixture based on the individual determined  $T_4$ -REP factors.

respectively, could not be detected in most tissues and were considered to have insignificant BAFs.

The functional group is known to change the affinity for TTR in an amyloid fibril inhibition assay (Baures *et al.*, 1998), where 78 compounds from different chemical classes were tested. The nitro substituents were less effective compared to carboxylates, while compounds with a hydroxyl group on the aromatic skeleton had the highest affinity. The hydroxyl group at the *para* or *meta* positions in the phenolic compounds significantly increased the binding potency to TTR (Gosh *et al.*, 2000; Hamers *et al.*, 2008; Meerts *et al.*, 2000; van den Berg, 1990). Apparently, the hydroxyl group itself without attachment to an electrophilic aromatic system is not enough to bind to the TTR, as we found no TTR binding by PFCs with functional hydroxyl groups. The importance of the functional group is also demonstrated by the lack of TTR binding observed for the N-substituted perfluoroalkyl sulfonamides. Apparently, acidic PFCs have much higher TTR binding potency than nonacidic PFCs. In our test system (pH = 8), acidic PFAS and PFAA (pKa < 3) are dissociated, while nonacidic fluorotelomer alcohols with much higher pKa values are nondissociated. Hence, the anionic state of acidic PFCs seems to enhance the TTR binding potency.

The hydroxyl group of the natural TTR ligand  $T_4$ , which is accompanied by two adjacent iodine atoms, is oriented to the inner part of the TTR-binding site (Gosh *et al.*, 2000). An alternative mechanism of binding to TTR has been shown, where the hydroxyl group of the potent TTR-binding compounds can be directed to the outer binding site, emphasizing that the presence of hydroxyl groups is not essential to be able to bind to TTR (Baures *et al.*, 1998; Gosh *et al.*, 2000). This “reversed” orientation was the exclusive binding mode for penta- and tri-bromophenols (Gosh *et al.*, 2000).

An x-ray crystallography study demonstrated that the anti-inflammatory drug flufenamic acid binds to TTR by occupying the innermost halogen-binding pocket (Peterson *et al.*, 1998). The  $CF_3$  substituent on the phenyl ring of flufenamic acid interacts with Van der Waals bonds to the amino acids Ser-117, Thr-119, Leu-110, and Ala-108. The carboxylate group on the other phenyl ring of flufenamic acid is located near the entrance of the binding site, forming electrostatic interactions with the side chains of the Lys-15 residues from opposing TTR subunits. The reversed binding orientation might be in accordance with the PFCs tested in this study, but this remains to be verified by structural methods.

The levels of the fluorinated compounds detected in blood of animals and humans are due to a strong association of the PFCs to proteins. The main carrier is believed to be albumin due to its high affinity for PFCs and high concentration in serum (Jones *et al.*, 2003). Several other serum proteins have been shown to be associated to PFCs in serum, e.g., sex hormone-binding globulin, corticosteroid-binding globulin, and liver FA-binding protein (Jones *et al.*, 2003; Luebker *et al.*, 2002;



Van den Heuvel *et al.*, 1992). The present study clearly demonstrates that TTR binding of PFCs can also explain the mechanism of PFC retention in human blood. Possibly, the same mechanism can explain the retention of PFCs in other species, as observed in laboratory studies and in wildlife (Houde *et al.*, 2006; Kudo and Kawashima, 2003; Lau *et al.*, 2007; Luebker *et al.*, 2002). It should be realized, however, that structural differences in TTR exist between species leading to different binding affinities. Although human TTR shows high similarity to TTR from other mammalian species such as rat (Cody, 2002) and monkey (Van Jaarsveld *et al.*, 1973), human TTR-binding affinity of endocrine disrupting compounds differs from TTR-binding affinity in fish (Morgado *et al.*, 2007) and birds (Ucán-Marín *et al.*, 2009).

It has been indicated that PFCs can be associated to blood cells in whole blood (Kärman *et al.*, 2006), although a contradictory study states that the PFCs are only found intracellularly (Ehresman *et al.*, 2007).

Human exposure levels of PFCs have recently been extensively reviewed (Fromme *et al.*, in press). Median plasma or serum levels of PFOS, PFOA, and PFHxS in human adults are 30, 12, and 4nM, respectively, in Europe ( $n = 7$  studies), and 60, 11, and 6nM, respectively, in North America ( $n = 13$ ). Comparing these levels to the  $IC_{50}$  values for determined in the present study (Table 2) shows that blood levels of the most potent TTR-binding PFCs are 23–153 times below  $IC_{50}$  level in European adults and 16–125 in North American adults. Alternatively, these blood levels can be converted into  $T_4$ -EQ concentrations corresponding to 3.1 and 5.1nM  $T_4$  in European and North American adults, respectively. In pregnant rats exposed to PFOS from gestation day (GD) 2–20, decreased levels of total serum  $T_4$  were found on GD 7 in the lowest dose group (1 mg/kg/day), corresponding to maternal serum levels of 12  $\mu$ g/ml PFOS (Thibodeaux *et al.*, 2003). Based on a molecular weight of 500 g/mol and a  $T_4$ -REP of 0.065 for PFOS (Table 2), this lowest observed adverse effect level (LOAEL) can be recalculated into 1.56 $\mu$ M  $T_4$ -EQ. Comparing the LOAEL to the PFC-related median  $T_4$ -EQ levels in serum from European and North American adults suggests a margin of safety (MOS) of 503 and 306, respectively.

This ratio between PFC blood levels and the  $IC_{50}$ -value for TTR-binding, as well as the calculated MOS based on  $T_4$ -EQ concentrations are relatively small, especially when we consider the fact that the latter does not account for uncertainty factors for interspecies and intraspecies differences and for conversion of the LOAEL into a no observed adverse effect level. Although TTR is less important for thyroid hormone transport in humans than in rodents, TTR is both in humans and in rodents the most important carrier protein for thyroid hormone to the developing fetus and the brain. Intraspecies differences are relevant because the MOS calculation is based on median PFC levels in serum, while in most studies, the range of PFC levels in adult serum spans at least one order of magnitude (Fromme *et al.*, in press). Vulnerable groups, such

as hypothyroid children and pregnant women, may also be more at risk. In addition, humans are not only exposed to PFCs but also to other halogenated environmental pollutants with significant TTR binding potencies, such as pentachlorophenol, tetrabrominated bisphenol-A, and metabolites of polychlorinated biphenyls and polybrominated diphenylethers with  $T_4$ -REP factors  $> 1$  (Hamers *et al.*, 2006, 2008; Lans *et al.*, 1993; Meerts *et al.*, 2000).

Finally, calculating the TTR binding potency of a mixture of PFCs into a  $T_4$ -EQ concentration may underestimate the actual combined potency of the mixture. In fact, the underlying concept of concentration addition does not seem to be valid, given the results from the mixture study indicating that the  $T_4$ -EQ potency of a PFC mixture is synergistic.

The median  $T_4$ -EQ concentrations of PFCs in human serum can also be directly compared to the natural level of  $T_4$  in serum from healthy adults, i.e., 64–154nM (www.thyroidmanager.org/). The ratio between the natural  $T_4$  levels and the anthropogenic  $T_4$ -EQ level attributable to PFCs is 21–50 and 13–30 times for European and North American adults, respectively, suggesting that these PFC levels could be able to interfere with the natural thyroid hormone serum transport.

A considerable lack of experimental data on the physicochemical parameters of PFCs hinders the construction of (Q)SARs. Chemical descriptors for these chemicals are difficult to estimate, as was recently shown for the octanol-water partition coefficient, vapor pressure, and air-water partition coefficient (Arp *et al.*, 2006). The values of these parameters were shown to vary considerably depending on the applied method. We also noted variations of up to five orders of magnitude for logP as calculated using five different logP methods (data not shown).

In the present work, we used simple descriptors based on the two-dimensional molecular structure of the compounds to visualize their chemical variation and for an attempt to model the SAR for the potency of PFCs to bind to TTR. The models indicate the dependence on molecular size and functional group but warrant a more detailed description on the chemical properties and data for validation and development.

In conclusion, the results of our study contribute to the understanding of the decreased levels of free  $T_4$  found in the presence of PFCs in serum and of the bioaccumulation of PFCs in humans and wildlife that may be partly attributed to the affinity of PFCs to bind to TTR in serum. PFCs have a TTR binding potency of only one-tenth of the natural hormone  $T_4$ , and they are less potent than many other environmental pollutants. However, due to their relatively high concentrations found in the environment (i.e., foremost PFOS) PFCs might contribute to the thyroid hormone-disrupting risk of environmental pollutants. The results also support the observations that binding to TTR can take place even in the absence of a hydrogen bond interaction of the hydroxyl group with the Ser-117 residue of the TTR. Due to earlier findings and because of the structural similarity with the natural ligand  $T_4$ ,

the research has so far been focused on phenolic compounds regarding the thyroid hormone disruption. This study suggests that a more diverse and larger number of halogenated compounds present in the environment may have the potential to inhibit and hence adversely affect the thyroid hormone system in animals and humans.

#### SUPPLEMENTARY DATA

Supplementary data are available online at <http://toxsci.oxfordjournals.org/>.

#### FUNDING

EU-supported program MODELKEY (Contract-No. 511237, Global Change and Ecosystems); the Marie Curie Research Training Network KEYBIOEFFECTS (MRTN-CT-2006-035695).

#### ACKNOWLEDGMENTS

We acknowledge Sammy So and Ike van der Veen for carrying out the LC retention time determination of all compounds of interest.

#### REFERENCES

- Aldred, A. R., Brack, C. M., and Schreiber, G. (1995). The cerebral expression of plasma protein genes in different species. *Comp. Biochem. Physiol. B Biochem. Mol. Biol.* **111**(1), 1–15.
- Arp, H.-P. H., Niederer, C., and Goss, K.-U. (2006). Predicting the partitioning behavior of various highly fluorinated compounds. *Environ. Sci. Technol.* **40**, 7298–7304.
- Baures, P. W., Peterson, S. A., and Kelly, J. W. (1998). Discovering transthyretin amyloid fibril inhibitors by limited screening. *Bioorg. Med. Chem.* **6**, 1389–1401.
- Biffinger, J. C., Kim, H. W., and DiMugno, S. G. (2004). The polar hydrophobicity of fluorinated compounds. *Chembiochem.* **5**, 622–627.
- Blake, C. C. F., Geisow, M. J., and Oatley, S. J. (1978). Structure of prealbumin: Secondary, tertiary and quaternary interactions determined by Fourier refinement at 1.8 Å. *J. Mol. Biol.* **121**, 339–356.
- Chang, S.-C., Thibodeaux, J. R., Eastvold, M. L., Ehresman, D. J., Bjork, J. A., Froehlich, J. W., Lau, C., Singh, R. J., Wallace, K. B., and Butenhoff, J. L. (2008). Thyroid hormone status and pituitary function in adult rats given oral doses of perfluorooctane sulfonate (PFOS). *Toxicology* **243**, 330–339.
- Cody, V. (2002). Mechanisms of molecular recognition: Crystal structure analysis of human and rat transthyretin inhibitor complexes. *Clin. Chem. Lab. Med.* **40**(12), 1237–1243.
- Ehresman, D. J., Froehlich, J. W., Olsen, G. W., Chang, S.-C., and Butenhoff, J. L. (2007). Comparison of human whole blood, plasma, and serum matrices for the determination of perfluorooctane sulfonate (PFOS), perfluorooctanoate (PFOA), and other fluorochemicals. *Environ. Res.* **103**, 176–184.
- Eriksson, L., Johansson, E., Kettaneh-Wold, N., and Wold, S. (1999). In *Multi- and Megavariable Data Analysis: Principles and Applications*. Umetrics Inc., Umeå, Sweden.
- Fromme, H., Tittlemier, S. A., Völkel, W., Willhelm, M., and Twardella, D. (2009). Perfluorinated compounds—Exposure assessment for the general population in western countries. In *Int. J. Hyg. Environ. Health.* **212**, 239–270; DOI: 10.1016/j.ijheh.2008.04.0007.
- Gosh, M., Meerts, I. A. T. M., Cook, A., Bergman, Å., Brouwer, A., and Johnson, L. N. (2000). Structure of human transthyretin complexed with bromophenols: New mode of binding. *Acta Crystallogr. Sect. D Biol. Crystallogr.* **D56**, 1085–1095.
- Hamers, T., Kamstra, J. H., Sonneveld, E., Murk, A. J., Kester, M. H. A., Andersson, P. L., Legler, J., and Brouwer, A. (2006). *In vitro* profiling of the endocrine-disrupting potency of brominated flame retardants. *Toxicol. Sci.* **92**(1), 157–173.
- Hamers, T., Kamstra, J. H., Sonneveld, E., Murk, A. J., Visser, T. J., van Velzen, M. J. M., Brouwer, A., and Bergman, Å. (2008). Biotransformation of brominated flame retardants into potentially endocrine-disrupting metabolites, with special attention to 2,2',4,4'-tetrabromodiphenyl ether (BDE-47). *Mol. Nutr. Food Res.* **52**(2), 284–298.
- Hoode, M., Martin, J. W., Letcher, R. J., Solomon, K. R., and Muir, D. C. G. (2006). Biological monitoring of polyfluoroalkyl substances: A review. *Environ. Sci. Technol.* **40**(11), 3463–3473.
- Hu, W., Jones, P. D., Upham, B. L., Trosko, J. E., Lau, C., and Giesy, J. P. (2002). Inhibition of gap junctional intercellular communication by perfluorinated compounds in rat liver and dolphin kidney epithelial cell lines *in vitro* and Sprague-Dawley rats *in vivo*. *Toxicol. Sci.* **68**, 429–436.
- Inoue, K., Okada, F., Ito, R., Kato, S., Sasaki, S., Nakajima, S., Uno, A., Saijo, Y., Sata, F., Yoshimura, Y., *et al.* (2004). Perfluorooctane sulfonate (PFOS) and related perfluorinated compounds in human maternal and cord blood samples: Assessment of PFOS exposure in a susceptible population during pregnancy. *Environ. Health Perspect.* **112**(11), 1204–1207.
- Jackson, J. E. (1991). In *A User's Guide to Principal Components*. John Wiley, New York.
- Jones, P. D., Hu, W., De Coen, W., Newsted, J. L., and Giesy, J. P. (2003). Binding of perfluorinated fatty acids to serum proteins. *Environ. Toxicol. Chem.* **22**(11), 2639–2649.
- Kallenborn, R., Berger, U., and Järnberg, U. (2004). Perfluorinated alkylated substances (PFAS) in the Nordic environment. *TemaNord.* **2004**, 552.
- Kannan, K., Corsolini, S., Falandysz, J., Fillman, G., Senthil Kumar, K., Logonathan, B. G., Ali Mohd, M., Oliviero, J., van Wouwe, N., Yang, J. H., *et al.* (2004). Perfluorooctane sulfonate and related fluorochemicals in human blood from several countries. *Environ. Sci. Technol.* **38**, 4489–4495.
- Kärman, A., van Bavel, B., Järnberg, U., Hardell, L., and Lindström, G. (2006). Perfluorinated chemicals in relation to other persistent organic pollutants in human blood. *Chemosphere* **64**, 1582–1591.
- Kissa, E. (2001). In *Fluorinated Surfactants and Repellents*. Marcel Dekker Inc., New York.
- Kudo, N., and Kawashima, Y. (2003). Toxicity and toxicokinetics of perfluorooctanoic acid in humans and animals. *Toxicol. Sci.* **28**(2), 49–57.
- Lans, M. C., Klasson-Wheler, E., Willemsen, M., Meussen, E., Safe, S., and Brouwer, A. (1993). Structure-dependent, competitive interaction of hydroxy-polychlorobiphenyls, -dibenzo-*p*-dioxins and -dibenzofurans with human transthyretin. *Chem-Biol. Interact.* **88**, 7–21.
- Larsen, P. D., and Delallo, L. (1989). Cerebrospinal fluid transthyretin in the neonate and blood-cerebrospinal fluid barrier permeability. *Ann. Neurol.* **25**(6), 628–630.
- Lau, C., Anitole, K., Hodes, C., Lai, D., Pfahles-Hutchens, A., and Seed, J. (2007). Perfluoroalkyl acids: A review of monitoring and toxicological findings. *Toxicol. Sci.* **99**(2), 366–394.

- Lau, C., Butenhoff, J. L., and Rogers, J. M. (2008). The developmental toxicity of perfluoroalkyl acids and their derivatives. *Toxicol. Appl. Pharmacol.* **198**, 231–241.
- Lau, C., Thibodeaux, J. R., Hanson, R. G., Rogers, J. M., Grey, B. E., Stanton, M. E., Butenhoff, J. L., and Stevenson, L. A. (2003). Exposure to perfluorooctane sulfonate during pregnancy in rat and mouse. II: Postnatal evaluation. *Toxicol. Sci.* **74**, 382–392.
- Luebker, D. J., Hansen, K. J., Bass, N. M., Butenhoff, J. L., and Seacat, A. M. (2002). Interactions of fluorochemicals with rat liver fatty acid-binding protein. *Toxicology* **176**, 175–185.
- Martin, J. W., Mabury, S. A., Solomon, K. R., and Muir, D. C. G. (2003). Bioconcentration and tissue distribution of perfluorinated acids in rainbow trout (*Oncorhynchus mykiss*). *Environ. Toxicol. Chem.* **22**(1), 196–204.
- Meerts, I. A. T. M., van Zanden, J. J., Luijckx, E. A. C., van Leeuwen-Bol, I., Marsh, G., Jakobsson, E., Bergman, Å., and Brouwer, A. (2000). Potent competitive interactions of some brominated flame retardants and related compounds with human transthyretin *in vitro*. *Toxicol. Sci.* **56**, 95–104.
- Morgado, I., Hamers, T., van der Veen, L., and Power, D. M. (2007). Disruption of thyroid hormone binding to sea bream recombinant transthyretin by ioxinyl and polybrominated diphenyl ethers. *Chemosphere* **69**, 155–163.
- Peterson, S. A., Klabunde, T., Lashuel, H. A., Purkey, H., Sacchettini, J. C., and Kelly, J. W. (1998). Inhibiting transthyretin conformational changes that lead to amyloid fibril formation. *Proc. Natl. Acad. Sci. U S A* **95**(22), 12956–12960.
- Seacat, A. M., Thomford, P. J., Hansen, K. J., Clemen, L. A., Eldridge, S. R., Elcombe, C. R., and Butenhoff, J. L. (2003). Sub-chronic dietary toxicity of potassium perfluorooctanesulfonate in rats. *Toxicology* **183**, 117–131.
- Seacat, A. M., Thomford, P. J., Hansen, K. J., Olsen, G. W., Case, M. T., and Butenhoff, J. L. (2002). Subchronic toxicity studies on perfluorooctane sulfonate potassium salt in cynomolgus monkeys. *Toxicol. Sci.* **68**, 249–264.
- Somack, R., Nordeen, S. K., and Eberhardt, N. L. (1982). Photoaffinity labeling of human thyroxine-binding prealbumin with thyroxine and N-(ethyl-2-diazomalonyl)thyroxine. *Biochemistry* **21**, 5651–5660.
- Thibodeaux, J. R., Hanson, R. G., Rogers, J. M., Grey, B. E., Barbee, B. D., Richards, J. H., Butenhoff, J. L., Stevenson, L. A., and Lau, C. (2003). Exposure to perfluorooctane sulfonate during pregnancy in rat and mouse. I: Maternal and prenatal evaluations. *Toxicol. Sci.* **74**, 369–381.
- Ucán-Marín, F., Arukwe, A., Mortensen, A., Gabrielsen, G. W., Fox, G. A., and Letcher, R. J. (2009). Recombinant transthyretin purification and competitive binding with organohalogen compounds in two gull species (*Larus argentatus* and *Larus hyperboreus*). *Toxicol. Sci.* **107**(2), 440–450.
- Van den Berg, K. J. (1990). Interactions of chlorinated phenols with thyroxine binding sites of human transthyretin, albumin and thyroid binding globulin. *Chem-Biol. Interact.* **76**, 63–75.
- Van den Heuvel, J. P., Kuslikis, B. I., and Peterson, R. E. (1992). Covalent binding of perfluorinated fatty acids to proteins in the plasma, liver and testes of rats. *Chem-Biol. Interact.* **82**, 317–328.
- Van Jaarsveld, P., Branch, W. T., and Robbins, J. (1973). Polymorphism of rhesus monkey serum prealbumin. *J. Biol. Chem.* **248**(22), 7898–7903.
- Van Leeuwen, S. P. J., van der Veen, I., Leonards, P. E. G., and De Boer, J. (2006). Perfluorinated compounds in edible Dutch fish: A source for human exposure. *Organohalogen Compd.* **68**, 535–538.
- Van Leeuwen, S. P. J., Van Velzen, M., Swart, C. P., Van der Veen, I., Traag, W., and De Boer, J. (2009). Halogenated contaminants in farmed salmon, trout, tilapia, pangasius and shrimps. *Environ. Sci. Technol.* (accepted).
- Wold, S. (1978). Cross-validated estimation of the number of components in factor and principal component analysis. *Technometrics* **20**, 397–405.
